# Supplementary material for: Systemic factors related to soluble (pro)renin receptor in plasma of patients with proliferative diabetic retinopathy
Source: PLOS journal article supplement (doi:10.1371/journal.pone.0189696), 2017-12-14
Supplement: S1 (10.1371/journal.pone.0189696.s001) [file journal.pone.0189696.s001]

## Hase et al., S1 Fig

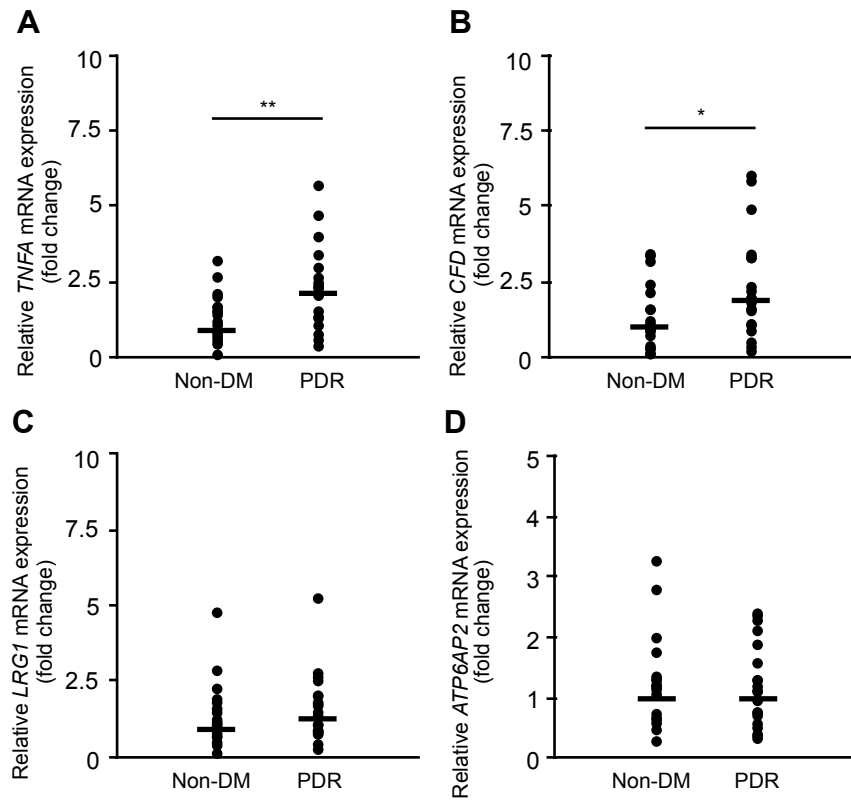

### S1 Fig. mRNA expression levels of inflammatory mediator and RAS initiators in peripheral whole blood samples.

Relative RNA expression levels of *TNFA* (A), *CFD* (B), *LRG1* (C) and *ATP6AP2* (D) in peripheral whole blood from the non-DM and PDR subjects.  $n = 20$  in each group,  $*p < 0.05$ , and  $**p < 0.01$ . Statistical analysis was performed using the Student's t test following the ANOVA.
