# Supplementary material for: Systemic factors related to soluble (pro)renin receptor in plasma of patients with proliferative diabetic retinopathy
Source: PLOS journal article supplement (doi:10.1371/journal.pone.0189696), 2017-12-14
Supplement: S3 (10.1371/journal.pone.0189696.s003) [file journal.pone.0189696.s003]

## Hase et al., S3 Fig

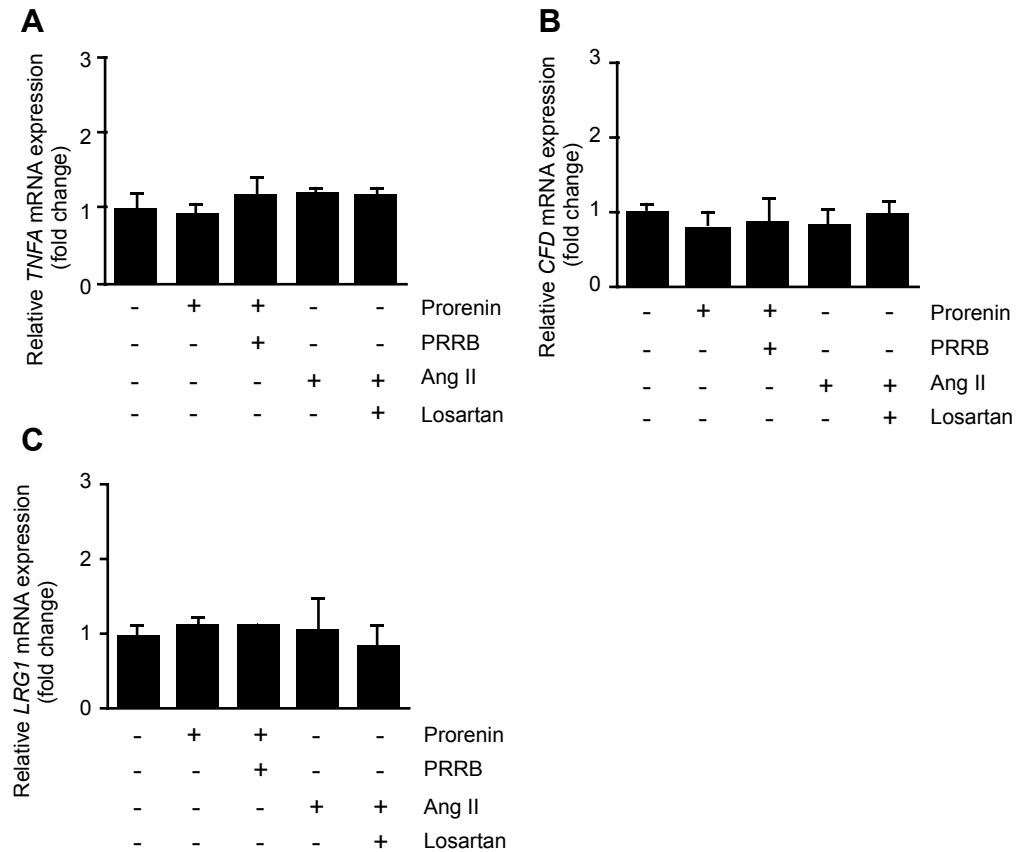

### **S3 Fig. *TNFA*, *LRG1* and *CFD* mRNA in HRMECs treated with prorenin and Ang II.**

Relative RNA expression levels of *TNFA* (A), *CFD* (B), and *LRG1* (C) in HRMECs stimulated by prorenin or Ang II with or without these receptor antagonists. n = 6. Ang II: angiotensin II. Statistical analysis was performed using the Student's t test following the ANOVA.
